# Supplementary material for: Shell chemistry of the boreal Campanian bivalve Rastellum diluvianum (Linnaeus, 1767) reveals temperature seasonality, growth rates and life cycle of an extinct Cretaceous oyster
Source: Copernicus journal article supplement (doi:10.5194/bg-17-2897-2020), 2020-06-03
Supplement: Supplementary file 1 [file bg-17-2897-2020-supplement.pdf]

Supplement of Biogeosciences, 17, 2897–2922, 2020  
<https://doi.org/10.5194/bg-17-2897-2020-supplement>  
© Author(s) 2020. This work is distributed under  
the Creative Commons Attribution 4.0 License.

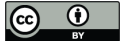

*Supplement of*

**Shell chemistry of the boreal Campanian bivalve *Rastellum diluvianum* (Linnaeus, 1767) reveals temperature seasonality, growth rates and life cycle of an extinct Cretaceous oyster**

Niels J. de Winter et al.

*Correspondence to:* Niels J. de Winter (niels.de.winter@vub.be)

The copyright of individual parts of the supplement might differ from the CC BY 4.0 License.

## Supplement files

All supplementary files are stored in the open access online database Zenodo and can be accessed using the following link: <https://doi.org/10.5281/zenodo.3699542>

- S1:** High resolution (6400 dpi) scans of cross sections through the 12 shells of *Rastellum diluvianum* used in this study.
- S2:** Compilation of  $\mu$ XRF maps of cross sections through the 12 shells of *Rastellum diluvianum* used in this study.
- S3:** Compilation of XRF line scans measured through the foliated calcite of *Rastellum diluvianum* shells.
- S4:** Compilation of LA-ICP-MS data collected within the context of this study.
- S5:** Compilation of IRMS data used in this study.
- S6:** Composite figures of XRF linescan data through the shells of *Rastellum diluvianum*.
- S7:** Source code of the bivalve growth model adapted from Judd et al. (2018) including temperature equations for calcite.
- S8:** Compilation of strontium isotope data and ages used in this study.
- S9:** Compilation of the results from growth modelling on 5 *Rastellum diluvianum* shells.
- S10:** Compilation figures of proxy record data plotted on time axis for all 5 shells for which modelling was carried out.
- S11:** Plot of ontogenetic trends in  $\delta^{13}\text{C}$  and Li/Ca proxies including statistics on the spread of the slopes of these trends.
- S12:** Data on trends in  $\delta^{13}\text{C}$  and Li/Ca.
- S13:** Data used to create seasonality crossplots shown in **Fig. 7**.
- S14:** Data on statistics of the growth rates, seasonality and spawning season of all 5 bivalves for which modelling was done.
